# Supplementary material
Source: PubMed Central journal article supplement (PMC6246829)
Supplement: 12264_2018_255_MOESM1_ESM.pdf [file 12264_2018_255_MOESM1_ESM.pdf]

**Supplementary materials**

**Taurine Transporter dEAAT2 is Required for Auditory Transduction in  
*Drosophila***

Ying Sun<sup>1</sup>, Yanyan Jia<sup>1</sup>, Yifeng Guo<sup>1</sup>, Fangyi Chen<sup>3\*</sup>, Zhiqiang Yan<sup>1,2\*</sup>

<sup>1</sup>State Key Laboratory of Medical Neurobiology, Human Phenome Institute, Ministry of Education Key Laboratory of Contemporary Anthropology, Collaborative Innovation Center of Genetics and Development, Department of Physiology and Biophysics, School of Life Sciences, Fudan University, Shanghai 200438, China.

<sup>2</sup>Department of Human Anatomy, School of Basic Medicine Sciences, Southwest Medical University, Luzhou 646000, China.

<sup>3</sup>Department of Biomedical Engineering, Southern University of Science and Technology, Shenzhen 518055, China

*dEAAT2-Gal4 > UAS-CD8-GFP*

**A**

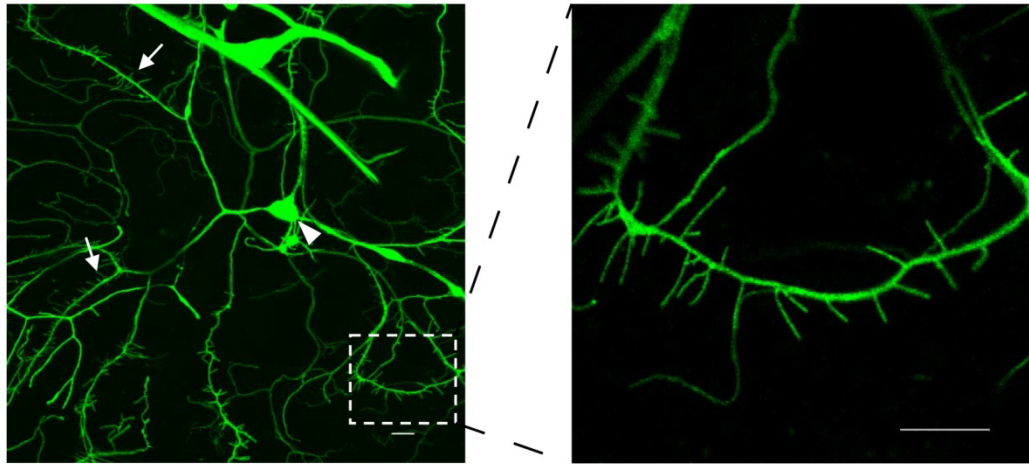

**B**

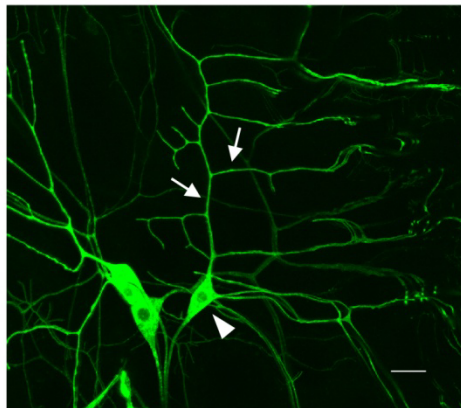

**Fig. S1** *dEAAT2* is expressed in multidendritic neurons. **A** Left: class III dendritic arborization (da) neuron (ddaA shown here) labeled by *dEAAT2-Gal4*. Right: high magnification image from region in the left panel showing the spike-like protrusions, which are the hallmark of class III neurons. Arrowhead, cell body; arrows, spike-like protrusions. **B** Class I da neuron labeled by *dEAAT2-Gal4*. Arrowhead, cell body; arrows, dendrite. Green indicates GFP signals. (Scale bars, 10  $\mu\text{m}$ )

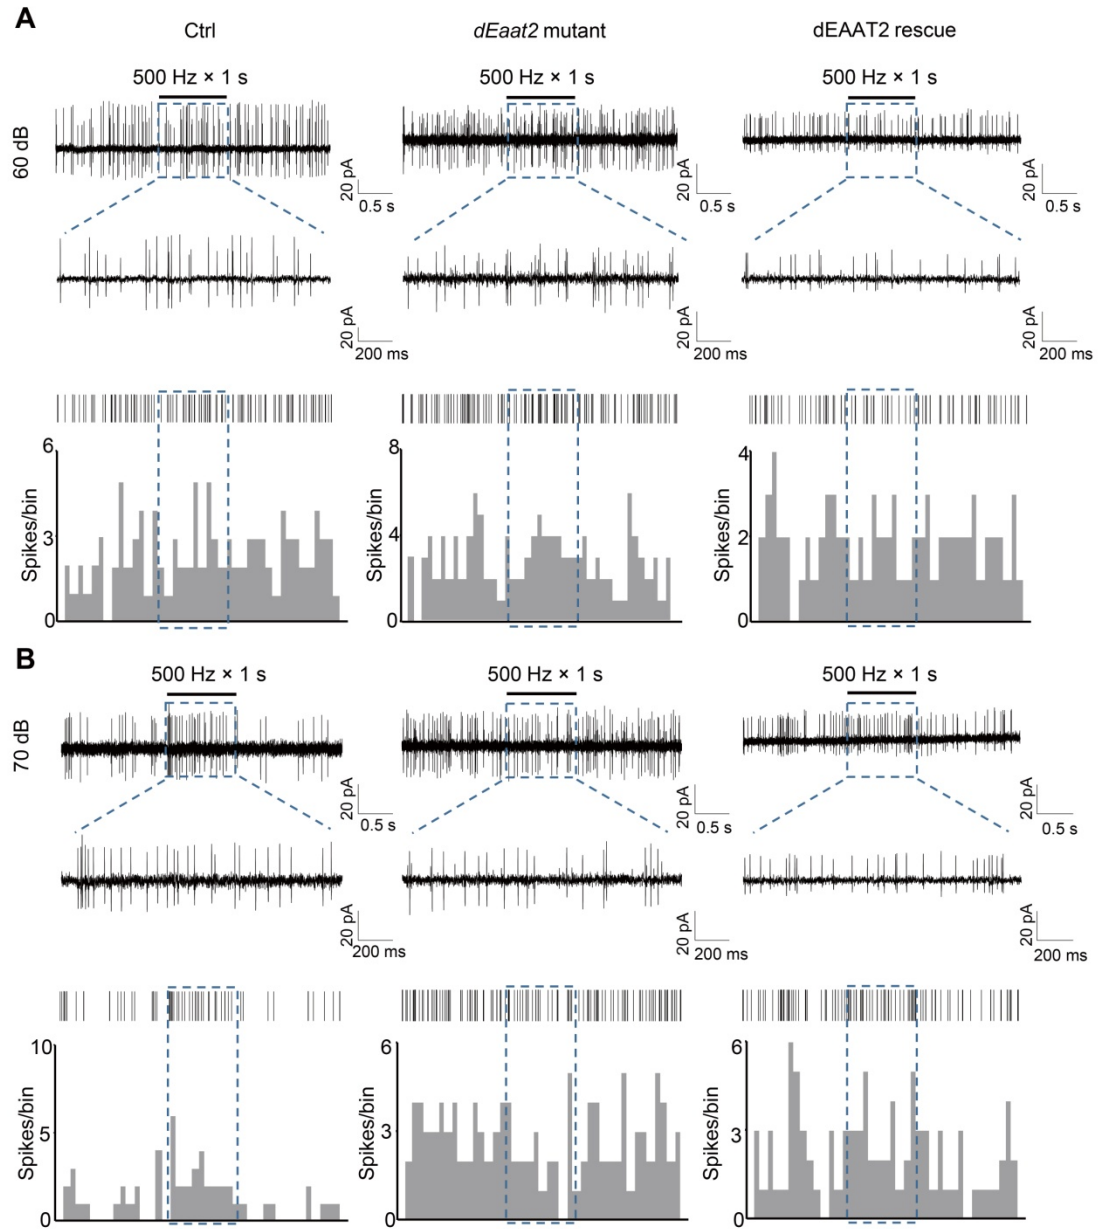

**Fig. S2** Action potential firing responses of *vchA* chordotonal neurons to a 500-Hz sound at 60 (**A**) and 70 dB (**B**) in control (left), *dEaat2* mutant (center), and dEAAT2 rescue (right) larvae. Upper panels: original traces; middle panels: raster plots of spikes; lower panels: post-stimulus time histograms of spikes (bin width, 100 ms). Black bars, sound stimulation; blue boxes and dashed lines indicate expanded views of spiking activity during prolonged delivery of a 500-Hz sound. Ctrl: +/+; *NOMPC-Gal4/UAS-CD8-GFP*. *dEaat2* mutant: *dEaat2<sup>MI</sup>/dEaat2<sup>MI</sup>*;

*NOMPC-Gal4/UAS-CD8-GFP.*      dEAAT2      rescue:      *dEaat2<sup>MI</sup>/dEaat2<sup>MI</sup>*;

*NOMPC-Gal4/UAS-dEAAT2-EGFP.*

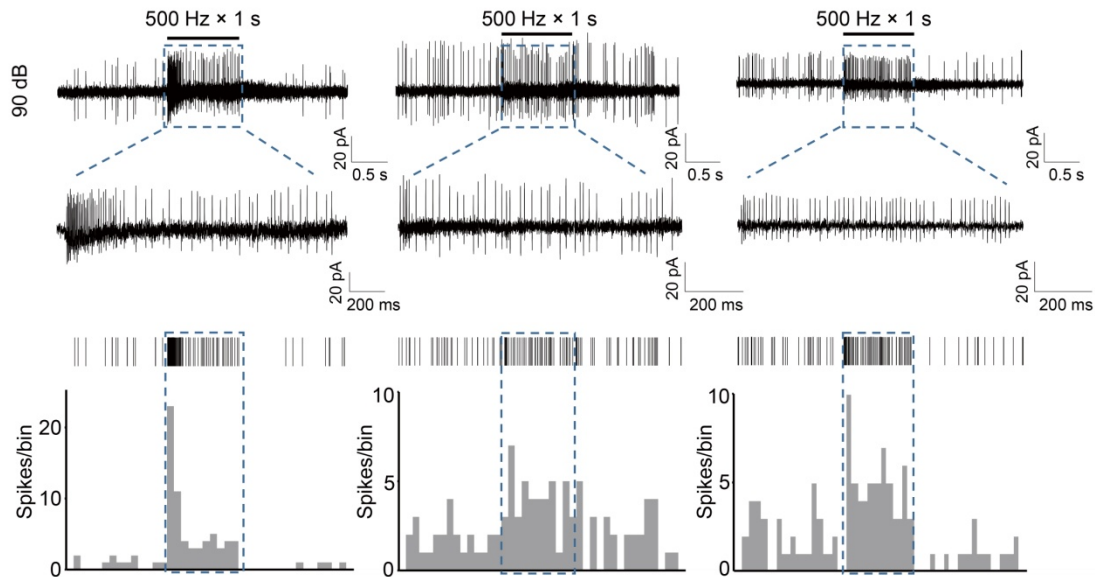

**Fig. S3** Action potential firing responses of vchA chordotonal neurons to a 500-Hz sound of 90 dB in control (left), *dEaat2* mutant (center), and dEAAT2 rescue (right) larvae. Upper panels: original traces; middle panels: raster plots of spikes; lower panels: post-stimulus time histograms of spikes (bin width, 100 ms). Black bars, sound stimulation; blue boxes and dashed lines indicate expanded views of spiking activity during a prolonged delivery of 500-Hz sound. Ctrl: +/+;

*NOMPC-Gal4/UAS-CD8-GFP.*      *dEaat2*      mutant:      *dEaat2<sup>MI</sup>/dEaat2<sup>MI</sup>*;

*NOMPC-Gal4/UAS-CD8-GFP.*      dEAAT2      rescue:      *dEaat2<sup>MI</sup>/dEaat2<sup>MI</sup>*;

*NOMPC-Gal4/UAS-dEAAT2-EGFP.*

**Movie S1** Larval startle response to a 500-Hz sound at 90 dB.
